# Supplementary material for: Sirolimus Drug-Eluting Stent (DES) in Vertebral Artery Ostial Stenosis: Insights from a Multicenter Analysis
Source: Research Square preprint supplement (doi:10.21203/rs.3.rs-8165183/v1), 2025-12-02
Supplement: Supplementary file 1 [file 6352b4d080b890625b9491dd.docx]

**Table S1.** **Patient Baseline Characteristics** **for ISR vs. Non-ISR**

| Variable | Non-ISR  (N=104) | ISR  (N=5) | P-value | Multivariate Analysis  **Adjusted OR (95% CI)** | P-value |
| --- | --- | --- | --- | --- | --- |
| Male Sex, N (%) | 87 (83.7%) | 4 (80.0%) | 1.000 |  |  |
| BMI (Mean ± SD) | 21.4 ± 7.8 | 25.1 ± 1.9 | **0.007*** | 1.32 (1.10–1.58) | **0.002**** |
| Age (Mean ± SD) | 69.6 ± 7.3 | 66.0 ± 6.1 | 0.269 |  |  |
| Hypertension, N (%) | 78 (75.0%) | 4 (80.0%) | 1.000 |  |  |
| Diabetes, N (%) | 45 (43.3%) | 1 (20.0%) | 0.394 |  |  |
| Coronary Artery Disease, N (%) | 14 (13.5%) | 0 (0.0%) | 1.000 |  |  |
| Hyperhomocysteinemia, N (%) | 26 (25.0%) | 0 (0.0%) | 0.335 |  |  |
| Dyslipidemia, N (%) | 50 (48.1%) | 2 (40.0%) | 1.000 |  |  |
| Smoking History, N (%) | 16 (15.4%) | 1 (20.0%) | 0.579 |  |  |
| Prior Radial PCI, N (%) | 14 (13.5%) | 0 (0.0%) | 1.000 |  |  |
| Preoperative Antiplatelet Use, N (%) | 72 (69.2%) | 3 (60.0%) | 0.646 |  |  |
| Preoperative Statin Use, N (%) | 71 (68.3%) | 4 (80.0%) | 1.000 |  |  |
| TIA, N (%) | 33 (31.7%) | 2 (40.0%) | 0.655 |  |  |
| Stroke, N (%) | 71 (68.3%) | 3 (60.0%) |  |  |

ISR: in-stent stenosis; BMI: body mass index; PCI: percutaneous coronary intervention; TIA: transient ischemic attacks.

*Statistical significance: *P<0.05, **P<0.01, ***P<0.001.
